# Supplementary material for: Therapeutic benefits of maintaining CDK4/6 inhibitors and incorporating CDK2 inhibitors beyond progression in breast cancer
Source: eLife journal article supplement (doi:10.7554/elife.104545), 2025-01-27
Supplement: fig1-figsupp3-data1 [file Figure 1, figure supplement 3, source data 1.pdf › Figure 1, figure supplement 3, source data 1/Figure 1, figure supplement 3, source data 1.pdf]

A

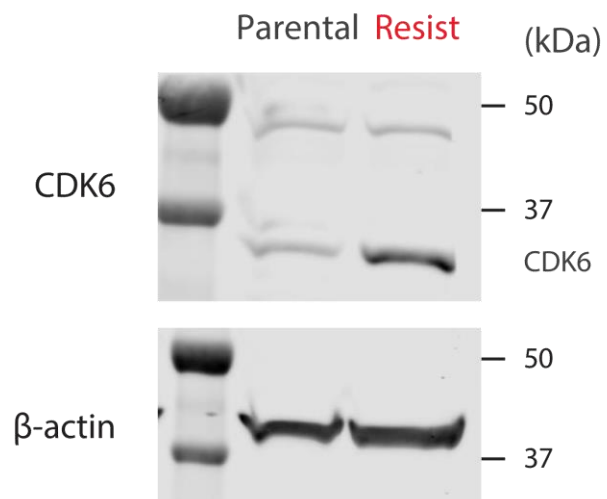

B

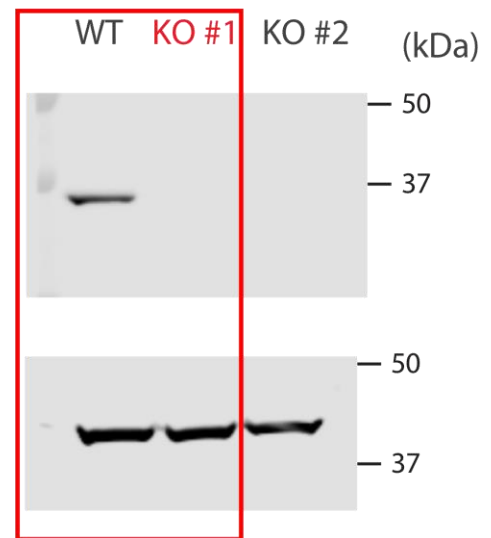

**Figure 1, figure supplement 3, source data 1.** Original membranes corresponding to Figure1 – figure supplement 3A, B. Immunoblot showing CDK6 and  $\beta$ -actin expression in drug-naïve and palbociclib-resistant cells (A) and WT and CDK6-KO cells (B). KO clone #1 was used for subsequent experimentation. Precision plus protein standards were used and molecular weights indicated.
