# Supplementary material for: Therapeutic benefits of maintaining CDK4/6 inhibitors and incorporating CDK2 inhibitors beyond progression in breast cancer
Source: eLife journal article supplement (doi:10.7554/elife.104545), 2025-01-27
Supplement: fig3-data1 [file Figure 3, source data 1.pdf › Figure 3, source data 1/Figure 3, source data 1.pdf]

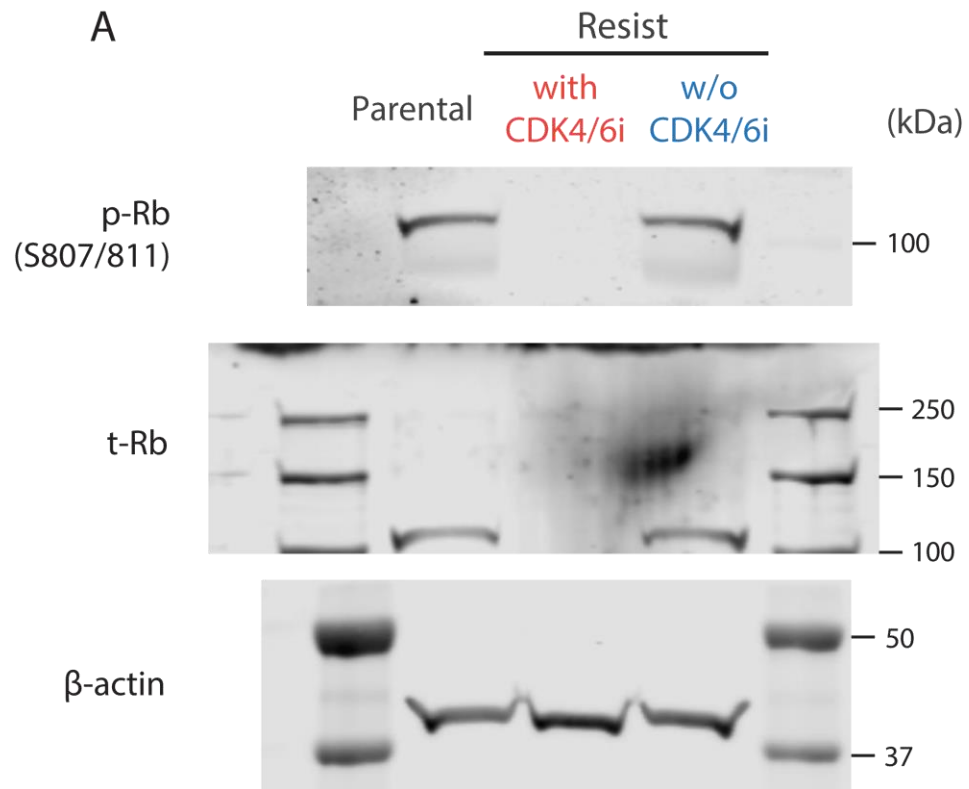

**Figure 3, source data 1.** Original membranes corresponding to Figure 3A. Immunoblot of phosphorylated Rb (S807/811; p-Rb), total Rb (t-Rb), and  $\beta$ -actin protein levels in MCF-7 cells. Drug-resistant cells were harvested two weeks after drug withdrawal. Precision plus protein standards were used and molecular weights indicated.
