# Supplementary material for: Therapeutic benefits of maintaining CDK4/6 inhibitors and incorporating CDK2 inhibitors beyond progression in breast cancer
Source: eLife journal article supplement (doi:10.7554/elife.104545), 2025-01-27
Supplement: fig3-figsupp1-data1 [file Figure 3, figure supplement 1, source data 1.pdf › Figure 3, figure supplement 1, source data 1/Figure 3, figure supplement 1, source data 1.pdf]

A

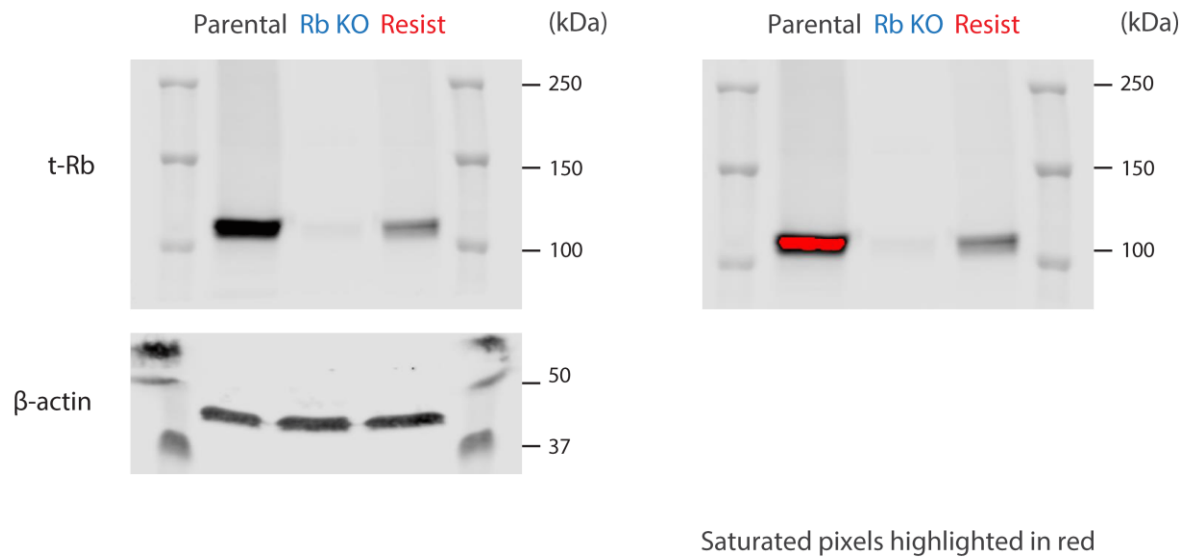

**Figure 3, figure supplement 1, source data 1.** Original membranes corresponding to Figure 3 – figure supplement 2A. Immunoblot showing total Rb and  $\beta$ -actin in WT, Rb-KO, and palbociclib-resistant cells. Precision plus protein standards were used and molecular weights indicated. The image on the right shows saturated pixels highlighted in red.
