# Supplementary material for: Therapeutic benefits of maintaining CDK4/6 inhibitors and incorporating CDK2 inhibitors beyond progression in breast cancer
Source: eLife journal article supplement (doi:10.7554/elife.104545), 2025-01-27
Supplement: fig7-figsupp1-data1 [file Figure 7, figure supplement 1, source data 1.pdf › Figure 7, figure supplement 1, source data 1/Figure 7, figure supplement 1, source data 1.pdf]

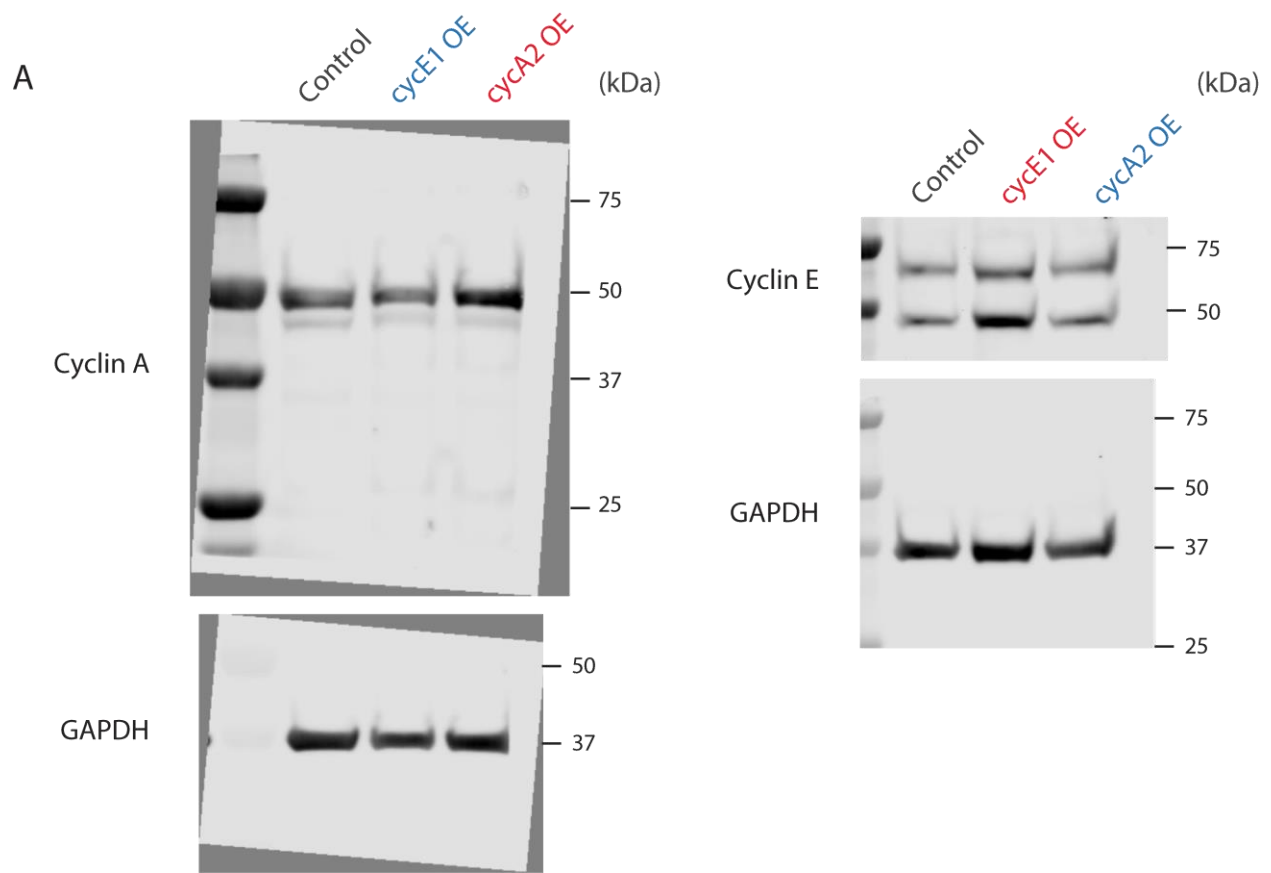

**Figure 7, figure supplement 1, source data 1.** Original membranes corresponding to Figure 7 – figure supplement 1A. Immunoblot showing the expression of GAPDH with cyclin A (left) or cyclin E (right) in MCF-7 cells with or without cyclin E1 or A2 overexpression. Cells were treated with doxycycline (500 nM) for 24 hr. Precision plus protein standards were used and molecular weights indicated.
